# Supplementary material for: Assessments of risk of bias in systematic reviews of observational nutritional epidemiologic studies are often not appropriate or comprehensive: a methodological study
Source: PubMed Central journal article supplement — BMJ Nutr Prev Health. 2021 Dec 7;4(2):487–500. doi: 10.1136/bmjnph-2021-000248 (PMC8718856; doi:10.1136/bmjnph-2021-000248), 2021-12-07

## **Assessments of risk of bias in systematic reviews of nutritional epidemiology studies are often not appropriate or comprehensive: a cross-sectional study**

### **Online Supplementary Material**

#### [Contents](#)

|                                                           |   |
|-----------------------------------------------------------|---|
| Online Supplementary Material 1: Search strategy.....     | 2 |
| Online Supplementary Material 2: PRISMA flow diagram..... | 3 |

## Online Supplementary Material 1: Search strategy

| <b>Appendix Table 1.1: Search strategy for MEDLINE (also adapted for EMBASE)</b> |                                                                                                                                                                                                                                                                                                                                                                                                                             |
|----------------------------------------------------------------------------------|-----------------------------------------------------------------------------------------------------------------------------------------------------------------------------------------------------------------------------------------------------------------------------------------------------------------------------------------------------------------------------------------------------------------------------|
| 1                                                                                | (diet* or (food* NOT "Food and Drug Administration") or beverage* or grain* or cereal* or bread* pasta* or rice* or potato* or vegetable* or fruit* or nut* or legume* or bean* or seed* or egg* or dairy or dairies or milk or yogurt or cheese* or fish or seafood or chicken or meat* or processed meat* or sugar-sweetened beverage* or soft drink* or alcohol* or chocolate* or coffee or tea or oil* or vitamin*).tw. |
| 2                                                                                | ((carbohydrate* ADJ3 consum*) or (carbohydrate* ADJ3 intake) or (protein ADJ3 consum*) or (protein ADJ3 intake) or (fat ADJ3 consum*) or (fat ADJ3 intake) or (fiber ADJ3 consum*) or (fibre ADJ3 intake)).tw.                                                                                                                                                                                                              |
| 3                                                                                | (dietary pattern* or eating pattern* or "Mediterranean diet*" or "Western diet*" or "DASH diet*").tw.                                                                                                                                                                                                                                                                                                                       |
| 4                                                                                | (Diet or Beverages or Fermented Foods or Food or Drinking Behavior).sh.                                                                                                                                                                                                                                                                                                                                                     |
| 5                                                                                | (1 OR 2 OR 3 OR 4)                                                                                                                                                                                                                                                                                                                                                                                                          |
| 6                                                                                | (MEDLINE OR (systematic AND review)).tw. OR meta analysis.pt                                                                                                                                                                                                                                                                                                                                                                |
| 7                                                                                | 5 and 6                                                                                                                                                                                                                                                                                                                                                                                                                     |
| 8                                                                                | (drug* or pharmaceutical* or surgery or surgical or surgeries).tw.                                                                                                                                                                                                                                                                                                                                                          |
| 9                                                                                | comment.pt. or letter.pt.                                                                                                                                                                                                                                                                                                                                                                                                   |
| 10                                                                               | 8 and 9                                                                                                                                                                                                                                                                                                                                                                                                                     |
| 11                                                                               | 7 not 10                                                                                                                                                                                                                                                                                                                                                                                                                    |
| 12                                                                               | Human filter                                                                                                                                                                                                                                                                                                                                                                                                                |
| 13                                                                               | 11 and 12                                                                                                                                                                                                                                                                                                                                                                                                                   |

| <b>Appendix Table 1.1: Search strategy for the Cochrane Database of Systematic Reviews</b>                                                                                                                                                                                                                                                                                                                                                                                                                                                                                                                                                                                                                                                                                                                                                                                        |  |
|-----------------------------------------------------------------------------------------------------------------------------------------------------------------------------------------------------------------------------------------------------------------------------------------------------------------------------------------------------------------------------------------------------------------------------------------------------------------------------------------------------------------------------------------------------------------------------------------------------------------------------------------------------------------------------------------------------------------------------------------------------------------------------------------------------------------------------------------------------------------------------------|--|
| ((diet* or (food* NOT "Food and Drug Administration") or beverage* or grain* or cereal* or bread* pasta* or rice* or potato* or vegetable* or fruit* or nut* or legume* or bean* or seed* or egg* or dairy or dairies or milk or yogurt or cheese* or fish or seafood or chicken or meat* or processed meat* or sugar-sweetened beverage* or soft drink* or alcohol* or chocolate* or coffee or tea or oil* or vitamin*):ti,ab,kw OR ((carbohydrate* near/3 consum* or carbohydrate* near/3 intake or protein near/3 consum* or protein near/3 intake or fat near/3 consum* or fat near/3 intake or fiber near/3 consum* or fibre near/3 intake):ti,ab,kw OR ((dietary pattern* or eating pattern* or "Mediterranean diet*" or "Western diet*" or "DASH diet*"):ti,ab,kw AND ("systematic review"):pt NOT (drug* or pharmaceutical* or surgery or surgical or surgeries):ti,ab,kw |  |

**Online Supplementary Material 2: PRISMA flow diagram**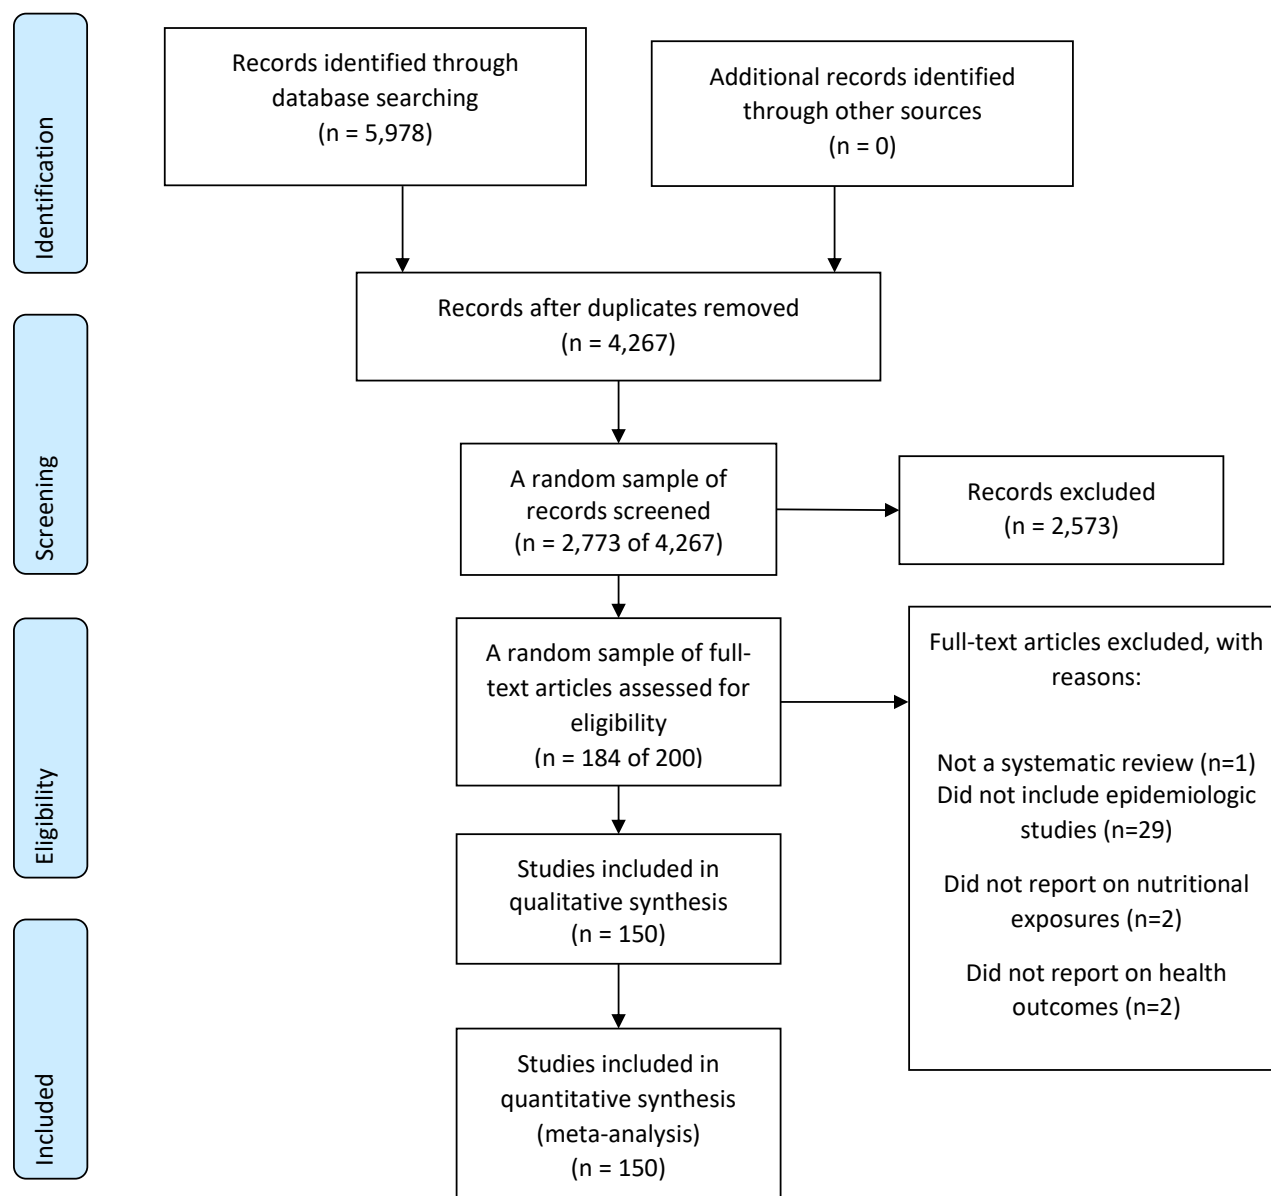

Supplement: bmjnph-2021-000248supp001.pdf [file bmjnph-2021-000248supp001.pdf]
